# Supplementary material for: Efficiency enhancement of graphene/silicon-pillar-array solar cells by HNO3 and PEDOT-PSS
Source: Royal Society of Chemistry journal article supplement (doi:10.1039/c2nr12001a), 2012-01-01
Supplement: c2nr12001a.pdf [file c2nr12001a.pdf]

## Efficiency Enhancement of Graphene/Silicon-Pillar-Array Solar Cells by HNO<sub>3</sub> and PEDOT-PSS

### Supporting information

Tingting Feng<sup>1</sup>, Dan Xie<sup>1\*</sup>, Yuxuan Lin<sup>1</sup>, Haiming Zhao<sup>1</sup>, Yu Chen<sup>1</sup>, He Tian<sup>1</sup>, Tianling Ren<sup>1\*</sup>, Xiao Li<sup>2</sup>,  
Zhen Li<sup>2</sup>, Kunlin Wang<sup>2</sup>, Dehai Wu<sup>2</sup>, Hongwei Zhu<sup>2,3\*</sup>

<sup>1</sup>Tsinghua National Laboratory for Information Science and Technology (TNList), Institute of  
Microelectronics, Tsinghua University, Beijing 100084, P. R. China

<sup>2</sup>Department of Mechanical Engineering, Tsinghua University, Beijing 100084, P. R. China

<sup>3</sup>Center for Nano and Micro Mechanics (CNMM), Tsinghua University, Beijing 100084, P. R. China

\* Corresponding author:

xiedan@mail.tsinghua.edu.cn, [rentl@tsinghua.edu.cn](mailto:rentl@tsinghua.edu.cn), [hongweizhu@tsinghua.edu.cn](mailto:hongweizhu@tsinghua.edu.cn)

#### A. The SEM images of prepared silicon-pillar-array (SPA) substrate

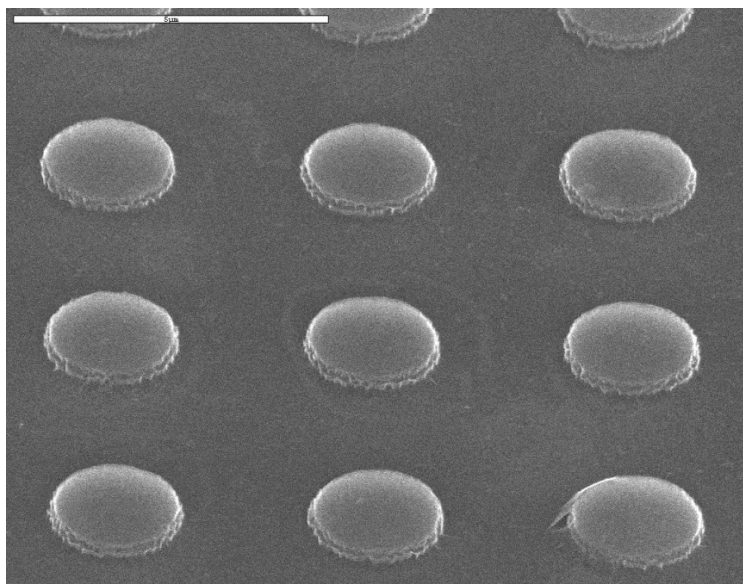

S1. The tilt view SEM image of the SPA substrate.

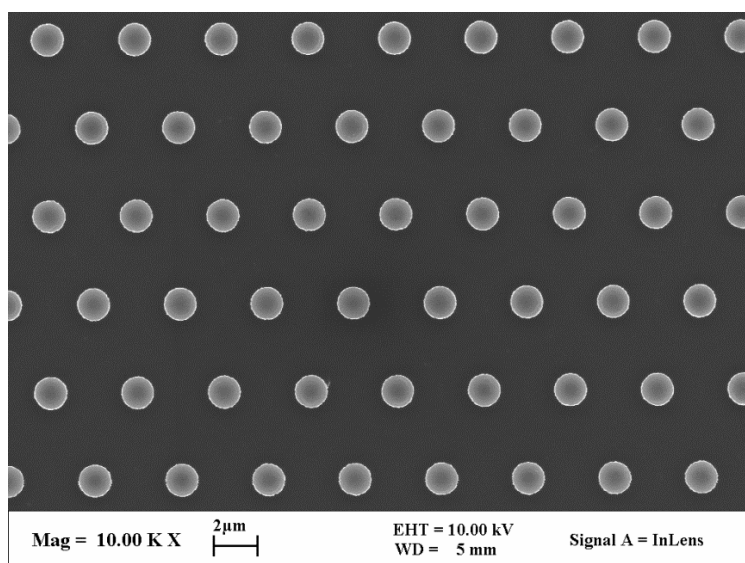

S2. The top view SEM image of the SPA substrate.

## B. Graphene growth

Graphene film was synthesized on copper foil by CVD method. Copper foil of 25 μm in thickness was washed with diluted hydrochloric acid for 10 min in ultrasonic bath to remove the metal oxide layer and impurities, then in deionized water for 10 min and dried with nitrogen gas. The prepared copper foil was then located at the center of the quartz tube, which was heated to 1000 °C at the rate of 20 °C/min under the reducing atmosphere (Ar:H<sub>2</sub>=400:100 mL/min). Then the temperature was held for 30 min for the growth of Cu crystal grain. Methane was used as the carbon source. The precipitation of the graphene film was carried out for 20 min, with a flow of Ar:CH<sub>4</sub> = 200:10 mL/min under air atmosphere. After that the tube were cooled down to room temperature at a cooling rate of 10 °C/s under the flow of Ar and H<sub>2</sub> mixed atmosphere.

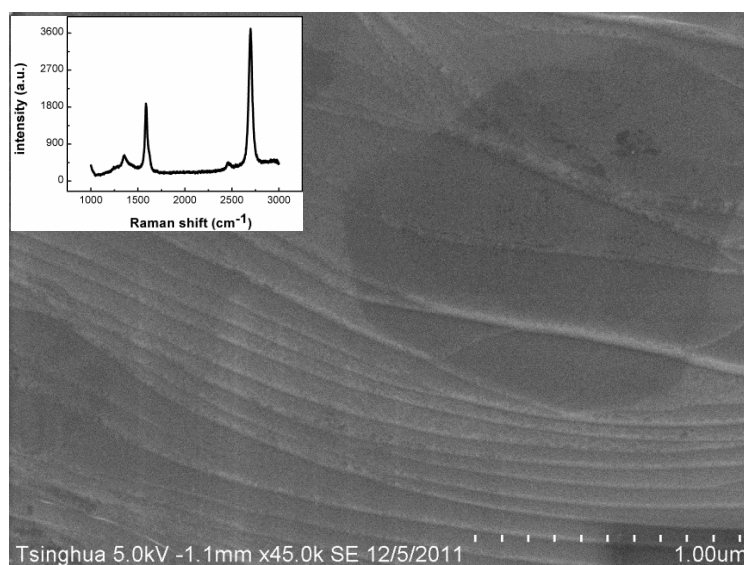

S3. The SEM image of graphene grown on copper foil by CVD method. Inset shows the Raman spectra of graphene which has been transferred on SiO<sub>2</sub>/Si substrate.

### C. Reflectance spectra of SPA substrate

The reflectance of SPA substrate and planar silicon substrate were tested. The results demonstrate the SPA substrate does show an anti-reflective property, which therefore is more advantageous for solar cell performance.

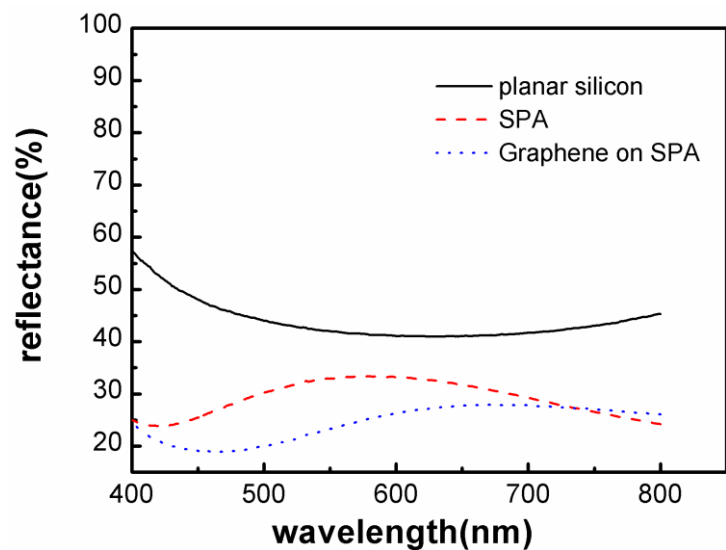

S4. The reflectance spectra of planar silicon substrate, SPA substrate and SPA substrate with graphene film in visible region (400nm - 800nm).
